# Supplementary material for: Increased IgG4 responses to multiple food and animal antigens indicate a polyclonal expansion and differentiation of pre-existing B cells in IgG4-related disease
Source: PubMed Central journal article supplement (PMC4392210; doi:10.1136/annrheumdis-2014-206405), 2015-02-02
Supplement: annrheumdis-2014-206405-s2.pdf [file annrheumdis-2014-206405-s2.pdf]

## Supplementary Table

**Table S1:** Demographics, characteristics and immunoglobulin values of the cohort.

|                                      | <b>IgG4-RD patients</b>                              | <b>PSC high IgG4</b> | <b>Healthy controls</b> | <b>P values (ANOVA)</b> | <b>IgG4-RD vs PSC (KW)</b> | <b>IgG4-RD vs HC (KW)</b> | <b>PSC vs HC (KW)</b> |
|--------------------------------------|------------------------------------------------------|----------------------|-------------------------|-------------------------|----------------------------|---------------------------|-----------------------|
| <b>Absolute number</b>               | 24<br>14 treatment-naïve<br>10 treatment-experienced | 8                    | 18                      |                         |                            |                           |                       |
| <b>Age years median (range)</b>      | 65 (32-84)                                           | 65 (35-76)           | 48.5 (24-67)            | 0.001                   | 0.7085                     | 0.0007                    | 0.0905                |
| <b>Gender (male) %</b>               | 87.5                                                 | 62.5                 | 55.6                    | 0.608                   |                            |                           |                       |
| <b>Organs involved</b>               | 83.3                                                 | 0                    | 0                       |                         |                            |                           |                       |
| <b>AIP/IRC %</b>                     | 70.8                                                 | 0                    | 0                       |                         |                            |                           |                       |
| <b>Systemic OOI %</b>                |                                                      |                      |                         |                         |                            |                           |                       |
| <b>Allergy or atopy %</b>            | 41.67                                                | 25.0                 | 37.5                    | 0.073                   |                            |                           |                       |
| <b>Serum IgG G/L median (range)</b>  | 19.55 (8.24-59.1)                                    | 14.15 (11.6-20.1)    | 10.22 (8.3-14.5)        | <0.0001                 | 0.0727                     | <0.0001                   | 0.1054                |
| <b>Serum IgG1 G/L median (range)</b> | 8.27 (5.25-32.2)                                     | 8.26 (6.94-14.6)     | 5.98 (4.37-7.31)        | 0.0104                  | 0.9512                     | 0.0126                    | 0.0622                |
| <b>Serum IgG4 G/L median (range)</b> | 8.22 (0.37-54.1)                                     | 2.33 (1.4-3.53)      | 0.31 (0.04-0.9)         | <0.0001                 | 0.0186                     | <0.0001                   | 0.0002                |
| <b>Serum IgE G/L median (range)</b>  | 397.5 (5.9-1006.0)                                   | 57.1 (29.6-125)      | 39.65 (7.75-300)        | 0.0025                  | 0.1148                     | 0.0019                    | 0.5994                |

**Abbreviations:** IgG4-RD ‘IgG4-related disease’; PSC ‘primary sclerosing cholangitis’; AIP ‘autoimmune pancreatitis’; IRC ‘IgG4-related cholangitis’; OOI ‘other organ involvement’; KW ‘Kruskal-Wallis test with multiple comparisons’.
